# Supplementary material for: Improvement project in higher education institutions: A BPEP-based model
Source: PLoS One. 2020 Jan 3;15(1):e0227353. doi: 10.1371/journal.pone.0227353 (PMC6941826; doi:10.1371/journal.pone.0227353)
Supplement: S1 Table — (XLSX) [file pone.0227353.s001.xlsx]

## Sheet: S1
varname	L1	L2	L3	L4	L5	L6	C4	C5	C6	S3	S4	S5	MAKM1	MAKM2	MAKM3	MAKM4	MAKM5	W1	W2	W3	W4	W5	W6	O1	O2	O3	O4	O5	O6	R1	R2	R3	R4	R5	R6	R7	R8	R9	R10	R11
L1	1	0.776488	0.784946	0.705454	0.737928	0.581485	0.515962	0.466698	0.544019	0.575385	0.629487	0.580706	0.523688	0.498459	0.544666	0.569421	0.547505	0.520704	0.485645	0.46347	0.501597	0.52506	0.557522	0.512415	0.523632	0.500455	0.41151	0.405223	0.490565	0.37362	0.471046	0.504248	0.462891	0.526578	0.497126	0.552235	0.538949	0.511601	0.53177	0.379099
L2	0.776488	1	0.790239	0.74991	0.76574	0.666021	0.552663	0.49711	0.584935	0.625456	0.651204	0.613264	0.550252	0.521946	0.591824	0.576177	0.58274	0.552939	0.547458	0.519866	0.533538	0.578326	0.609451	0.558357	0.564487	0.532013	0.45317	0.446142	0.480932	0.409383	0.484057	0.512579	0.497031	0.518707	0.527567	0.571676	0.564	0.527807	0.588728	0.428586
L3	0.784946	0.790239	1	0.74021	0.781365	0.637035	0.529253	0.481893	0.533609	0.620318	0.677309	0.621753	0.561456	0.518354	0.598304	0.573982	0.572653	0.553563	0.514377	0.472868	0.500336	0.565708	0.572212	0.556344	0.570826	0.532765	0.44791	0.452184	0.515632	0.44385	0.511156	0.545648	0.505014	0.556262	0.536207	0.577612	0.594358	0.566571	0.567976	0.437233
L4	0.705454	0.74991	0.74021	1	0.776206	0.679452	0.558641	0.540573	0.5863	0.576331	0.620072	0.600098	0.548741	0.511031	0.55457	0.556565	0.531852	0.544389	0.549701	0.489261	0.528925	0.553432	0.576078	0.551551	0.56219	0.52462	0.449942	0.423747	0.529696	0.409894	0.527817	0.547936	0.493504	0.537193	0.549741	0.55733	0.578148	0.560487	0.583831	0.423833
L5	0.737928	0.76574	0.781365	0.776206	1	0.677046	0.543264	0.538011	0.600834	0.585376	0.639438	0.60569	0.57293	0.532495	0.588292	0.580323	0.567519	0.540582	0.508528	0.474214	0.52685	0.559303	0.593342	0.557038	0.573863	0.54532	0.440906	0.429538	0.504699	0.415096	0.482676	0.513422	0.478011	0.540537	0.513049	0.551511	0.549026	0.532585	0.572071	0.397302
L6	0.581485	0.666021	0.637035	0.679452	0.677046	1	0.471644	0.472119	0.501711	0.537385	0.587887	0.534029	0.519493	0.486202	0.536418	0.492452	0.496325	0.499394	0.486468	0.454568	0.473784	0.520202	0.556478	0.504146	0.507179	0.489601	0.430553	0.414591	0.483078	0.440789	0.466207	0.471552	0.479541	0.436645	0.492406	0.500906	0.491822	0.485606	0.540014	0.383502
C4	0.515962	0.552663	0.529253	0.558641	0.543264	0.471644	1	0.780623	0.720391	0.617491	0.631161	0.619488	0.622885	0.606142	0.634896	0.654579	0.630498	0.565256	0.48573	0.473165	0.449672	0.545398	0.543472	0.533717	0.523554	0.4869	0.412802	0.373999	0.464174	0.400737	0.48647	0.502855	0.497396	0.51405	0.572725	0.588962	0.525098	0.508337	0.559461	0.387341
C5	0.466698	0.49711	0.481893	0.540573	0.538011	0.472119	0.780623	1	0.721796	0.586293	0.591382	0.576224	0.624843	0.593679	0.637129	0.6151	0.58835	0.553694	0.483267	0.465273	0.44875	0.51293	0.50984	0.516068	0.525979	0.510053	0.397172	0.388781	0.492184	0.403196	0.459058	0.511857	0.474017	0.50658	0.544231	0.555616	0.53172	0.516117	0.5584	0.412806
C6	0.544019	0.584935	0.533609	0.5863	0.600834	0.501711	0.720391	0.721796	1	0.609978	0.688769	0.6924	0.663503	0.629504	0.651341	0.684091	0.662439	0.638875	0.549255	0.502799	0.500676	0.590427	0.601926	0.562162	0.567348	0.559453	0.441681	0.397583	0.506006	0.413313	0.493124	0.529094	0.508837	0.526695	0.583508	0.604261	0.582695	0.554641	0.572434	0.420997
S3	0.575385	0.625456	0.620318	0.576331	0.585376	0.537385	0.617491	0.586293	0.609978	1	0.784938	0.69425	0.652196	0.610291	0.666479	0.650974	0.628907	0.6223	0.571408	0.561927	0.586507	0.630025	0.62701	0.591067	0.572658	0.587788	0.526795	0.516953	0.5659	0.468533	0.479244	0.508996	0.516577	0.493366	0.562796	0.561854	0.579444	0.545317	0.585678	0.437768
S4	0.629487	0.651204	0.677309	0.620072	0.639438	0.587887	0.631161	0.591382	0.688769	0.784938	1	0.77763	0.722353	0.643643	0.710334	0.694595	0.69112	0.656046	0.595727	0.548837	0.557411	0.664785	0.666565	0.661472	0.630373	0.59547	0.510722	0.504282	0.594837	0.4496	0.530464	0.579027	0.583198	0.608841	0.623552	0.636081	0.624094	0.611626	0.642972	0.495013
S5	0.580706	0.613264	0.621753	0.600098	0.60569	0.534029	0.619488	0.576224	0.6924	0.69425	0.77763	1	0.622307	0.59836	0.676534	0.662469	0.666005	0.652386	0.611323	0.56356	0.541934	0.637195	0.64425	0.637975	0.582804	0.592578	0.521698	0.488494	0.559284	0.419065	0.500123	0.539367	0.525117	0.523127	0.554254	0.611753	0.585896	0.583743	0.585601	0.440378
MAKM1	0.523688	0.550252	0.561456	0.548741	0.57293	0.519493	0.622885	0.624843	0.663503	0.652196	0.722353	0.622307	1	0.819161	0.788397	0.812648	0.760289	0.685211	0.591145	0.581239	0.557004	0.662085	0.651507	0.620554	0.580459	0.582317	0.467374	0.47212	0.576199	0.492942	0.577456	0.615548	0.577604	0.622107	0.598907	0.644043	0.613814	0.593295	0.664331	0.442411
MAKM2	0.498459	0.521946	0.518354	0.511031	0.532495	0.486202	0.606142	0.593679	0.629504	0.610291	0.643643	0.59836	0.819161	1	0.811481	0.783999	0.769917	0.680472	0.571056	0.552229	0.528672	0.639203	0.630578	0.567825	0.568526	0.577878	0.49942	0.452975	0.569134	0.478746	0.524465	0.543049	0.546572	0.54509	0.550248	0.582759	0.555569	0.557742	0.605794	0.393383
MAKM3	0.544666	0.591824	0.598304	0.55457	0.588292	0.536418	0.634896	0.637129	0.651341	0.666479	0.710334	0.676534	0.788397	0.811481	1	0.812727	0.787619	0.718712	0.635996	0.612025	0.598353	0.694187	0.692693	0.650415	0.619468	0.609262	0.521129	0.526197	0.60672	0.542043	0.578576	0.606351	0.603534	0.601337	0.601358	0.642435	0.632643	0.639642	0.67925	0.449269
MAKM4	0.569421	0.576177	0.573982	0.556565	0.580323	0.492452	0.654579	0.6151	0.684091	0.650974	0.694595	0.662469	0.812648	0.783999	0.812727	1	0.841563	0.702971	0.600492	0.584033	0.579077	0.673447	0.664346	0.638452	0.626033	0.603888	0.501316	0.501501	0.592566	0.519097	0.56988	0.586164	0.592979	0.619775	0.610012	0.664421	0.640549	0.604456	0.658833	0.449644
MAKM5	0.547505	0.58274	0.572653	0.531852	0.567519	0.496325	0.630498	0.58835	0.662439	0.628907	0.69112	0.666005	0.760289	0.769917	0.787619	0.841563	1	0.716597	0.608535	0.60289	0.566359	0.678429	0.670292	0.601666	0.591731	0.60937	0.5503	0.51152	0.596623	0.502135	0.568056	0.592773	0.596331	0.634901	0.594704	0.644715	0.638563	0.604655	0.646922	0.479315
W1	0.520704	0.552939	0.553563	0.544389	0.540582	0.499394	0.565256	0.553694	0.638875	0.6223	0.656046	0.652386	0.685211	0.680472	0.718712	0.702971	0.716597	1	0.749478	0.663338	0.636559	0.726681	0.750957	0.634705	0.621037	0.629741	0.612789	0.551097	0.59719	0.509546	0.559915	0.58173	0.549976	0.541177	0.562631	0.600589	0.603119	0.595037	0.622508	0.436064
W2	0.485645	0.547458	0.514377	0.549701	0.508528	0.486468	0.48573	0.483267	0.549255	0.571408	0.595727	0.611323	0.591145	0.571056	0.635996	0.600492	0.608535	0.749478	1	0.727089	0.645205	0.702783	0.738152	0.626468	0.577778	0.614487	0.601668	0.561475	0.581604	0.458778	0.526211	0.532252	0.508873	0.475671	0.535485	0.577896	0.561784	0.602295	0.614008	0.433419
W3	0.46347	0.519866	0.472868	0.489261	0.474214	0.454568	0.473165	0.465273	0.502799	0.561927	0.548837	0.56356	0.581239	0.552229	0.612025	0.584033	0.60289	0.663338	0.727089	1	0.648628	0.678999	0.704539	0.57633	0.535676	0.543206	0.539425	0.517724	0.555479	0.452779	0.488126	0.490842	0.4962	0.471711	0.505828	0.532552	0.54259	0.565779	0.573454	0.442104
W4	0.501597	0.533538	0.500336	0.528925	0.52685	0.473784	0.449672	0.44875	0.500676	0.586507	0.557411	0.541934	0.557004	0.528672	0.598353	0.579077	0.566359	0.636559	0.645205	0.648628	1	0.685239	0.770778	0.58043	0.543115	0.564088	0.553085	0.527266	0.577684	0.499703	0.456475	0.457043	0.484758	0.448669	0.510141	0.547609	0.543577	0.525727	0.546325	0.429036
W5	0.52506	0.578326	0.565708	0.553432	0.559303	0.520202	0.545398	0.51293	0.590427	0.630025	0.664785	0.637195	0.662085	0.639203	0.694187	0.673447	0.678429	0.726681	0.702783	0.678999	0.685239	1	0.799885	0.670234	0.60018	0.609801	0.565008	0.533455	0.610968	0.495739	0.577171	0.596636	0.575906	0.585465	0.61074	0.641391	0.630525	0.621251	0.656153	0.495257
W6	0.557522	0.609451	0.572212	0.576078	0.593342	0.556478	0.543472	0.50984	0.601926	0.62701	0.666565	0.64425	0.651507	0.630578	0.692693	0.664346	0.670292	0.750957	0.738152	0.704539	0.770778	0.799885	1	0.659026	0.602545	0.615565	0.578462	0.530022	0.61244	0.521269	0.56163	0.576061	0.557319	0.568983	0.59209	0.632858	0.611741	0.601297	0.636665	0.463279
O1	0.512415	0.558357	0.556344	0.551551	0.557038	0.504146	0.533717	0.516068	0.562162	0.591067	0.661472	0.637975	0.620554	0.567825	0.650415	0.638452	0.601666	0.634705	0.626468	0.57633	0.58043	0.670234	0.659026	1	0.779753	0.71869	0.617436	0.620185	0.702084	0.517488	0.546762	0.55845	0.565185	0.56333	0.576687	0.613514	0.579513	0.601041	0.603755	0.497972
O2	0.523632	0.564487	0.570826	0.56219	0.573863	0.507179	0.523554	0.525979	0.567348	0.572658	0.630373	0.582804	0.580459	0.568526	0.619468	0.626033	0.591731	0.621037	0.577778	0.535676	0.543115	0.60018	0.602545	0.779753	1	0.761264	0.645892	0.61376	0.700488	0.512215	0.511413	0.532932	0.529034	0.534872	0.561711	0.589797	0.568333	0.577648	0.603558	0.480801
O3	0.500455	0.532013	0.532765	0.52462	0.54532	0.489601	0.4869	0.510053	0.559453	0.587788	0.59547	0.592578	0.582317	0.577878	0.609262	0.603888	0.60937	0.629741	0.614487	0.543206	0.564088	0.609801	0.615565	0.71869	0.761264	1	0.761381	0.673468	0.70662	0.447925	0.490653	0.51521	0.496529	0.526374	0.552519	0.568076	0.566152	0.593835	0.563775	0.485665
O4	0.41151	0.45317	0.44791	0.449942	0.440906	0.430553	0.412802	0.397172	0.441681	0.526795	0.510722	0.521698	0.467374	0.49942	0.521129	0.501316	0.5503	0.612789	0.601668	0.539425	0.553085	0.565008	0.578462	0.617436	0.645892	0.761381	1	0.736247	0.708309	0.453233	0.447653	0.43678	0.457917	0.400899	0.435883	0.441955	0.4684	0.526476	0.508907	0.420376
O5	0.405223	0.446142	0.452184	0.423747	0.429538	0.414591	0.373999	0.388781	0.397583	0.516953	0.504282	0.488494	0.47212	0.452975	0.526197	0.501501	0.51152	0.551097	0.561475	0.517724	0.527266	0.533455	0.530022	0.620185	0.61376	0.673468	0.736247	1	0.750283	0.437859	0.409989	0.42267	0.400608	0.414935	0.441062	0.448465	0.459004	0.501228	0.479751	0.420169
O6	0.490565	0.480932	0.515632	0.529696	0.504699	0.483078	0.464174	0.492184	0.506006	0.5659	0.594837	0.559284	0.576199	0.569134	0.60672	0.592566	0.596623	0.59719	0.581604	0.555479	0.577684	0.610968	0.61244	0.702084	0.700488	0.70662	0.708309	0.750283	1	0.498983	0.518498	0.516662	0.515633	0.496561	0.544753	0.544701	0.558645	0.595828	0.591774	0.497191
R1	0.37362	0.409383	0.44385	0.409894	0.415096	0.440789	0.400737	0.403196	0.413313	0.468533	0.4496	0.419065	0.492942	0.478746	0.542043	0.519097	0.502135	0.509546	0.458778	0.452779	0.499703	0.495739	0.521269	0.517488	0.512215	0.447925	0.453233	0.437859	0.498983	1	0.606189	0.517918	0.596989	0.482032	0.488033	0.559997	0.56159	0.534991	0.530391	0.464367
R2	0.471046	0.484057	0.511156	0.527817	0.482676	0.466207	0.48647	0.459058	0.493124	0.479244	0.530464	0.500123	0.577456	0.524465	0.578576	0.56988	0.568056	0.559915	0.526211	0.488126	0.456475	0.577171	0.56163	0.546762	0.511413	0.490653	0.447653	0.409989	0.518498	0.606189	1	0.821247	0.691018	0.651969	0.661358	0.678678	0.704316	0.631952	0.680155	0.570759
R3	0.504248	0.512579	0.545648	0.547936	0.513422	0.471552	0.502855	0.511857	0.529094	0.508996	0.579027	0.539367	0.615548	0.543049	0.606351	0.586164	0.592773	0.58173	0.532252	0.490842	0.457043	0.596636	0.576061	0.55845	0.532932	0.51521	0.43678	0.42267	0.516662	0.517918	0.821247	1	0.686744	0.701991	0.701426	0.727994	0.717804	0.665982	0.705099	0.557854
R4	0.462891	0.497031	0.505014	0.493504	0.478011	0.479541	0.497396	0.474017	0.508837	0.516577	0.583198	0.525117	0.577604	0.546572	0.603534	0.592979	0.596331	0.549976	0.508873	0.4962	0.484758	0.575906	0.557319	0.565185	0.529034	0.496529	0.457917	0.400608	0.515633	0.596989	0.691018	0.686744	1	0.667732	0.678502	0.692219	0.691693	0.667195	0.686352	0.55427
R5	0.526578	0.518707	0.556262	0.537193	0.540537	0.436645	0.51405	0.50658	0.526695	0.493366	0.608841	0.523127	0.622107	0.54509	0.601337	0.619775	0.634901	0.541177	0.475671	0.471711	0.448669	0.585465	0.568983	0.56333	0.534872	0.526374	0.400899	0.414935	0.496561	0.482032	0.651969	0.701991	0.667732	1	0.779714	0.749267	0.741635	0.666907	0.704844	0.608879
R6	0.497126	0.527567	0.536207	0.549741	0.513049	0.492406	0.572725	0.544231	0.583508	0.562796	0.623552	0.554254	0.598907	0.550248	0.601358	0.610012	0.594704	0.562631	0.535485	0.505828	0.510141	0.61074	0.59209	0.576687	0.561711	0.552519	0.435883	0.441062	0.544753	0.488033	0.661358	0.701426	0.678502	0.779714	1	0.816483	0.775147	0.702303	0.752929	0.60529
R7	0.552235	0.571676	0.577612	0.55733	0.551511	0.500906	0.588962	0.555616	0.604261	0.561854	0.636081	0.611753	0.644043	0.582759	0.642435	0.664421	0.644715	0.600589	0.577896	0.532552	0.547609	0.641391	0.632858	0.613514	0.589797	0.568076	0.441955	0.448465	0.544701	0.559997	0.678678	0.727994	0.692219	0.749267	0.816483	1	0.803722	0.782078	0.804475	0.612103
R8	0.538949	0.564	0.594358	0.578148	0.549026	0.491822	0.525098	0.53172	0.582695	0.579444	0.624094	0.585896	0.613814	0.555569	0.632643	0.640549	0.638563	0.603119	0.561784	0.54259	0.543577	0.630525	0.611741	0.579513	0.568333	0.566152	0.4684	0.459004	0.558645	0.56159	0.704316	0.717804	0.691693	0.741635	0.775147	0.803722	1	0.770444	0.792984	0.655711
R9	0.511601	0.527807	0.566571	0.560487	0.532585	0.485606	0.508337	0.516117	0.554641	0.545317	0.611626	0.583743	0.593295	0.557742	0.639642	0.604456	0.604655	0.595037	0.602295	0.565779	0.525727	0.621251	0.601297	0.601041	0.577648	0.593835	0.526476	0.501228	0.595828	0.534991	0.631952	0.665982	0.667195	0.666907	0.702303	0.782078	0.770444	1	0.823748	0.635873
R10	0.53177	0.588728	0.567976	0.583831	0.572071	0.540014	0.559461	0.5584	0.572434	0.585678	0.642972	0.585601	0.664331	0.605794	0.67925	0.658833	0.646922	0.622508	0.614008	0.573454	0.546325	0.656153	0.636665	0.603755	0.603558	0.563775	0.508907	0.479751	0.591774	0.530391	0.680155	0.705099	0.686352	0.704844	0.752929	0.804475	0.792984	0.823748	1	0.645683
R11	0.379099	0.428586	0.437233	0.423833	0.397302	0.383502	0.387341	0.412806	0.420997	0.437768	0.495013	0.440378	0.442411	0.393383	0.449269	0.449644	0.479315	0.436064	0.433419	0.442104	0.429036	0.495257	0.463279	0.497972	0.480801	0.485665	0.420376	0.420169	0.497191	0.464367	0.570759	0.557854	0.55427	0.608879	0.60529	0.612103	0.655711	0.635873	0.645683	1
